# Leveraging pathogen community distributions to understand outbreak and emergence potential

Tad A. Dallas<sup>a,†</sup>, Colin J. Carlson<sup>b,c,†</sup> and Timothée Poisot<sup>d</sup>

<sup>a</sup>*Centre for Ecological Change, University of Helsinki, 00840 Helsinki, Finland*

<sup>b</sup>*National Socio-Environmental Synthesis Center, University of Maryland, Annapolis, Maryland 21401, USA.*

<sup>c</sup>*Department of Biology, Georgetown University, Washington, D.C. 20057, USA.*

<sup>d</sup>*Dépt de Sciences Biologiques, Univ. de Montréal, Montréal, Canada*

<sup>†</sup>*These authors contributed equally to this study.*

\*Corresponding author: [tad.a.dallas@gmail.com](mailto:tad.a.dallas@gmail.com)

1 **Running title:** Predicting pathogen emergence

2 **Author contributions:** TD, CJC, and TP conceived of the idea for the study.

3 TD and TP designed the model. All authors contributed to the writing of the  
4 manuscript.

5 **Data accessibility:** R code is available on figshare at

6 <https://doi.org/10.6084/m9.figshare.6364955>.

7 **Ethics:** This study used existing data on pathogen outbreak and emergence events  
8 in human populations.

9 **Funding:** This work was supported by the National Socio-Environmental Synthe-  
10 sis Center (SESYNC) under funding received from the National Science Foundation  
11 DBI-1639145.

12 **Competing interests:** The authors declare no competing interests.

13 **Keywords:** Emerging infectious disease, community ecology, community dissim-  
14 ilarity, disease forecasting, pathogen biogeography

15

## 16 **Abstract**

17 Understanding pathogen outbreak and emergence events has important implica-  
18 tions to the management of infectious disease. Apart from preempting infectious  
19 disease events, there is considerable interest in determining why certain pathogens  
20 are consistently found in some regions, and why others spontaneously emerge or re-  
21 emerge over time. Here, we use a trait-free approach which leverages information  
22 on the global community of human infectious diseases to estimate the potential for  
23 pathogen outbreak, emergence, and re-emergence events over time. Our approach  
24 uses pairwise dissimilarities among pathogen distributions between countries and  
25 country-level pathogen composition to quantify pathogen outbreak, emergence,  
26 and re-emergence potential as a function of time (e.g., number of years between  
27 training and prediction), pathogen type (e.g., virus), and transmission mode (e.g.,  
28 vector-borne). We find that while outbreak and re-emergence potential are well  
29 captured by our simple model, prediction of emergence events remains elusive,  
30 and sudden global emergences like an influenza pandemic seem beyond the predic-  
31 tive capacity of the model. While our approach allows for dynamic predictability  
32 of outbreak and re-emergence events, data deficiencies and the stochastic nature  
33 of emergence events may preclude accurate prediction; but our results make a  
34 compelling case for incorporating a community ecology perspective into existing  
35 disease forecasting efforts.

## 36 Introduction

37 The emergence of infectious diseases in humans and wildlife is a continuous and  
38 natural process that is nevertheless rapidly intensifying with global change (Jones  
39 *et al.*, 2008). Around the world, the diversity, and frequency, of infectious out-  
40 breaks is rising over time (Smith *et al.*, 2014; Jones *et al.*, 2008), and the vast  
41 majority of pathogens with zoonotic potential still have yet to emerge in human  
42 populations, with an estimated 600,000 minimum viruses with zoonotic potential  
43 (Carroll *et al.*, 2018). Intensifying pathways of contact between wildlife reser-  
44 voirs and humans, and rapid spread of new pathogens among human populations  
45 around the globe, are considered major drivers in this accelerating process (Cleave-  
46 land *et al.*, 2007; Tatem *et al.*, 2006). Changes in climate and land-use, as well  
47 as food insecurity and geopolitical conflict, are expected to exacerbate feedbacks  
48 between socio-ecological change and emerging infectious diseases (EIDs). In the  
49 face of these threats, the anticipation of disease emergence events is a seminal but  
50 elusive challenge for public health research (Morse *et al.*, 2012).

51 One forecasting approach recognizes that the drivers of emergence events are  
52 distributed non-randomly in space and time, and follow predictable regional pat-  
53 terns that inherently predispose some areas to a higher burden of EIDs (Allen  
54 *et al.*, 2017). Different classes of emerging pathogens (e.g., new pathogens versus  
55 drug-resistant strains of familiar ones; vector-borne and/or zoonotically transmit-  
56 ted diseases) follow different spatial risk patterns at a global scale (Jones *et al.*,  
57 2008). In part, this can be explained by the non-random distribution of host  
58 groups that disproportionately contribute to zoonotic emergence events, like bats  
59 and rodents (Johnson *et al.*, 2015a; Olival *et al.*, 2017), and are likely to continue  
60 to do so (Han *et al.*, 2016a,b, 2015). However, additional factors are strongly asso-  
61 ciated with the distribution of emerging infection risk; notably human population  
62 density, land cover, and land use change (Allen *et al.*, 2017). In addition to these

63 factors, deterministic emergence of disease is influenced by social, cultural, and  
64 economic factors (Bonds *et al.*, 2010; Farmer, 1996; McMichael, 2004; Murray &  
65 Schaller, 2010; Parkes *et al.*, 2005).

66 As a consequence of this heterogeneity in host distributions and other con-  
67 tributing factors, emerging pathogens may follow Tobler’s First Law (“near things  
68 are more related than distant things”; Tobler (1970)), and fall into a handful of  
69 global biogeographic regions with similar pathogen communities (Murray *et al.*,  
70 2015). However, with increasing global connectivity, both pathogens and the free-  
71 living organisms that host them are spreading around the world at an accelerating  
72 rate, and consequently the spatial structure of pathogen diversity is becoming less  
73 pronounced. One study examining a global pathogen-country network showed  
74 that modularity is decreasing while connectance is increasing over time: pathogen  
75 ranges are on average expanding, and over time, geographically-separate regions  
76 are facing more threats (Smith *et al.*, 2007; Poisot *et al.*, 2014). This process of  
77 biotic homogenization has critical implications for public health, as known diseases  
78 can become unfamiliar problems in novel locations, or can re-emerge in landscapes  
79 from which they were previously eradicated.

80 Leveraging disease ecology in global health settings requires models that con-  
81 sider disease emergence as a long-term process over space and time, extending  
82 beyond initial spillover events. Work that models the impact of human mobil-  
83 ity networks has arisen out of the pandemic influenza literature (Balcan *et al.*,  
84 2009; Russell *et al.*, 2008; Khan *et al.*, 2009), and has recently been successful in  
85 developing a multi-scale approach to anticipating emergence risk for hemorrhagic  
86 viruses in Africa (Pigott *et al.*, 2017). However, conceptually-similar work that  
87 models across global pathogen species is mostly unexplored. Murray *et al.* (2015)  
88 suggest that countries who share pathogens might be more likely targets during  
89 a given pathogen outbreak, but this approach does not leverage information on

90 the identity of the shared pathogens. Given the inherent need in estimating out-  
91 break potential, and the current availability of data on outbreak events, the need  
92 to leverage existing data for the dynamics prediction of outbreak potential is a  
93 pressing research need.

94 Here, we examine the predictability of pathogen biogeography over time us-  
95 ing a similarity-based approach that utilizes data on all pathogen outbreaks in all  
96 countries, but does not require information on pathogen traits or spatial structure.  
97 In the process of modeling outbreak predictability, we test a basic but important  
98 hypothesis: do recurring outbreaks have a more predictable signal than emergence  
99 events (and, implicitly, are emergence events predictable)? Within emergences,  
100 we further note the subtle difference between emergence and re-emergence, and  
101 hypothesize the factors driving these might be subtly different. While both may  
102 be driven by genetic shifts in pathogens or changing land use patterns enhancing  
103 transmission risk, re-emergence events are more likely to be related to weakened  
104 healthcare infrastructure, prematurely-terminated eradication campaigns (Chiap-  
105 pini *et al.*, 2013; Minor, 2004), or low detection long-term persistence of environ-  
106 mental pathogen reservoirs (e.g., anthrax spores in the soil; Carlson *et al.* (2018)).

107 Finally, we examine whether pathogens show any differences in predictability  
108 based on agent, class, or transmission mode. Diseases of zoonotic origin (i.e. with  
109 animal hosts) and with vector-borne transmission might be harder to predict due  
110 to hidden constraints on their distribution and more complicated outbreak dynam-  
111 ics than directly-transmitted pathogens have. On the other hand, commonalities  
112 between species that share vectors or reservoir hosts might lead to similarities in  
113 distributions (a common notion in pathogen biogeography, as in how dengue mod-  
114 els were frequently used in the early days of the Zika pandemic, given the shared  
115 vector *Aedes aegypti*; Bogoch *et al.* (2016); Carlson *et al.* (2016)). In this case,  
116 community-based prediction could be more powerful for zoonotic and vector-borne

117 diseases. Differential frequency of zoonotic and vector-borne transmission might  
118 also make different pathogen classes (viruses, bacteria, fungi, and macroparasites)  
119 more or less predictable, as might different dispersal ability on a global scale, with  
120 respiratory viruses usually presumed to spread the fastest, and macroparasites  
121 generally treated as the most dispersal-limited. Understanding how the role of  
122 community structure changes for these different pathogens can help contextualize  
123 the method we use, and understand how it might be built upon to account for  
124 these differences.

## 125 **Methods**

### 126 **Pathogen emergence data**

127 Data from the Global Infectious Diseases and Epidemiology Network (GIDEON)  
128 contains pathogen outbreak information at the country level obtained from case  
129 reports, governmental agencies, and published literature records (Berger, 2005; Yu  
130 & Edberg, 2005). Records with multiple etiological agents (e.g., “*Aeromonas* and  
131 marine *Vibrio* infx.”) and unresolved to agent level (e.g., “Respiratory viruses -  
132 miscellaneous”) were excluded from the model. In a handful of cases, we kept divi-  
133 sions between clinical presentations from the same pathogens, like cutaneous versus  
134 visceral leishmaniasis. The data obtained were yearly records between 1990 and  
135 2016, and consisted of pathogen outbreak and emergence events for 234 pathogens  
136 across 224 countries. While there are some data for pathogen events between 1980  
137 and 1990, the number of pathogen events reported was fewer than from 1990 on-  
138 ward, suggesting some potential reporting or sampling bias in these earlier years.  
139 Therefore, we restrict our analyses to pathogen occurrences after 1990. Based  
140 on supplemental data from Smith *et al.* (2007) and updated with recent litera-  
141 ture given several misclassifications, each was manually classified as a bacterial,

142 viral, fungal, protozoan, or macroparasitic disease, and as vector-borne and/or  
143 zoonotic or neither. In some rare cases, these were left as unknown; for example,  
144 Oropouche virus is vector-borne but its sylvatic cycle remains uncertain, while the  
145 environmental origin of Bas-Congo virus is altogether unknown.

146 While much can be gained by leveraging data on multiple pathogens to predict  
147 outbreak or emergence potential, there are some drawbacks. The most pronounced  
148 is that pandemic events may strongly influence model predictions, such that a pan-  
149 demic of one pathogen will decrease model performance when attempting to predict  
150 outbreak or emergence potential of other pathogens. We explore this further in the  
151 supplement, where we see the inclusion of influenza and the corresponding 2009 flu  
152 pandemic noticeably affects our model performance. As such, we remove influenza  
153 from the main text analyses, and place analyses containing flu in the supplement  
154 for comparison.

155 We distinguish between three different types of pathogen events; outbreak, re-  
156 emergence, and emergence. Outbreaks are pathogen events are recurrent pathogen  
157 events, quantified as having occurred in a given country within three years of a  
158 given year. Re-emergence events are those that did not occur within three years,  
159 but have occurred at some time in a given country in the past (a cutoff we chose  
160 inspired by World Health Organization guidelines for certifying regional eradica-  
161 tion of poliovirus or dracunculiasis). Lastly, emergence events were considered as  
162 the first record of a pathogen within a country.

### 163 **Model structure**

164 We developed a dissimilarity-based approach to forecast pathogen outbreak and  
165 emergence events that does not require country-level or pathogen traits data. Ap-  
166 plying tools from community ecology, we calculated mean pairwise dissimilarity  
167 (Bray-Curtis index,  $\overline{BC}$ ) values for countries (how dissimilar are the pathogen

168 communities between countries) and pathogens (how dissimilar are the geographic  
169 distributions of pathogens). For a given pair of countries  $a, b$  with  $P_a$  and  $P_b$   
170 pathogens each, and  $S$  shared pathogens among those, the Bray-Curtis index is  
171 given as:

$$BC_{a,b} = 1 - \frac{2S}{P_a P_b} \quad (1)$$

172 This can be treated as a measure of dissimilarity between different countries'  
173 pathogen communities. We then considered the potential for a pathogen to be  
174 found in a country proportional to the product of these dissimilarity values. We  
175 also included year as a covariate, resulting in a set of four variables for model  
176 training.

177 Using these data, we applied a statistical approach previously used for species  
178 distribution modeling (Drake & Richards, 2017) and link prediction in ecologi-  
179 cal networks (Dallas *et al.*, 2017a) called `plug-and-play` (PNP). This approach  
180 utilizes information on pathogen occurrence events, and also on background in-  
181 teractions — country-pathogen pairs which did not have a recorded outbreak —  
182 to estimate the suitability of a country for pathogen emergence from a particular  
183 pathogen (Figure 1). These suitability values can then be used to quantify model  
184 performance on data not used to train the model. Model performance was quanti-  
185 fied using Area Under the Curve (AUC), which captures the ability of the classifier  
186 to rank positive instances higher than negative instances.

### 187 **Assessing model performance**

188 We used the PNP modeling approach to address the possibility of predicting  
189 pathogen outbreak and emergence events, specifically examining three different  
190 potential scenarios. First, we examined how the inclusion of pathogen events from  
191 previous years influenced model accuracy. That is, we predicted pathogen events



192 of 2016 using data starting at 2015 and then including additional years until 1995.  
193 This was performed to determine the amount of data necessary to make accurate  
194 forecasts. Second, we examined how predictive accuracy was maintained as we at-  
195 tempted to predict both past (hindcast) and future (forecast) pathogen events. To  
196 do this, we trained models on a ten year period (either 2005-2015 for hindcasting,  
197 or 1990-2000 for forecasting), and used these models to predict pathogen events  
198 between 1990 and 2004 for hindcasting, and between 2001 and 2015 for forecast-  
199 ing. Lastly, we examined how the accuracy of predictions might have changed  
200 over time. Given increased surveillance in more recent years, predictive accuracy  
201 might be dependent on the time period at which models are trained and predic-  
202 tions made. To test this, we trained models along a rolling window of 4 years from  
203 1990-2015, using these models to predict pathogen events in the year following the  
204 final year of model training (e.g., a model trained on 1990-1994 would be used to  
205 predict pathogen events in 1995).

## 206 Results

207 We find that our dissimilarity-based model can predict outbreak events accurately,  
208 re-emergence events slightly less accurately, and emergence events only slightly bet-  
209 ter than random. This makes intuitive sense, as outbreak events occur repeatedly,  
210 providing not only ample data for model training, but also a clear tendency of a  
211 pathogen to occur in a country. That is, if the model is allowed to see 5 years  
212 of data, and the country has an outbreak of a particular pathogen in 4 of the 5  
213 years, a naive model would predict that an outbreak will likely occur with an 80%  
214 probability. Meanwhile, emergence events are determined by many unique drivers  
215 (Allen *et al.*, 2017), which may not be consistent across any two given emergence  
216 events, and which we evidently lack sufficient data to predict using our method.

217 While our model allows for dynamic predictability of outbreak and re-emergence  
218 events, data deficiencies and the stochastic nature of emergence events may thus  
219 preclude accurate prediction.

220 Our predictive model was sensitive to the number of training years (Figure 2),  
221 with accuracy plateauing around 5-10 years of training data; however, models also  
222 just trained on a single year (the temporally closest community matrix) seemed to  
223 perform disproportionately well, which would make sense if the community changes  
224 in a Markov-like process. We further examined the limits of predictability in terms  
225 of both hindcasting and forecasting pathogen outbreak and emergence events by  
226 training the model on a known period of 10 years, and then either forecasting or  
227 hindcasting  $t$  years into the past or future (Figure 3). Interestingly, our accuracy  
228 – measured as area under the receiver operating characteristic – did not decline  
229 at the same rate when hindcasting and forecasting. That is, model accuracy was  
230 higher when hindcasting relative to the accuracy of forecasts of the same duration  
231 of time away from the training data (Figure 3). This perhaps indicates that as  
232 the country-pathogen network becomes asymptotically more connected and stable  
233 (Poisot *et al.*, 2014), the network accumulates information content, reducing the  
234 time sensitivity of hindcasting performance.

235 Examining a rolling window of  $t$  years ( $t = 4$  years) over the last two decades,  
236 we failed to detect evidence that the enhanced reporting and surveillance in more  
237 recent years influenced our model’s predictive ability (Figure 4). This also suggests  
238 that even though there were annual variations in the sample size of both pathogens  
239 and countries, there was still consistency in the structure of the country-pathogen  
240 interaction matrix over time. We explore the sensitivity of this finding to the size  
241 of the rolling window in the Supplemental Materials.

242 Differences in PNP model accuracy among pathogen types existed when ex-  
243 amining the effect of the amount of data used for model training (Figure 2), with

244 viruses having lower accuracy relative to bacteria, fungi, or other parasites. The  
245 simplest explanation for this is that accuracy is sensitive to the number of events.  
246 However, the average number of viral occurrences over time ( $\bar{x} = 179$ ) was only  
247 slightly less than the average number of bacterial ( $\bar{x} = 185$ ) occurrences, and far  
248 greater than the average number of fungal ( $\bar{x} = 10$ ) or macroparasite ( $\bar{x} = 17.7$ ) or  
249 protozoan parasite ( $\bar{x} = 22.5$ ) occurrence events. The average number of pathogen  
250 occurrences over time is qualitatively proportional to the number of unique viruses  
251 ( $n = 83$ ), bacteria ( $n = 81$ ), fungi ( $n = 14$ ), macroparasites ( $n = 38$ ), and pro-  
252 tozoans ( $n = 15$ ) we examined. Interestingly, differences among pathogen types  
253 were not found when examining the ability of the modeling approach to hind-  
254 cast/forecast (Figure 3) or when examining predictive accuracy along a rolling  
255 window (Figure 4).

256 For our 2016 explanatory PNP model, differentiating pathogens based on zoonotic  
257 and vector-borne transmission modes suggested that both classes of pathogens  
258 were more difficult to forecast (Figure 2). Though we suspected data imbalance  
259 might drive this pattern, this seems unlikely: the majority of pathogens (144 of  
260 228) were zoonotic, and many (59 of 233) were vector-borne. A more compelling  
261 explanation is that this year was an anomalous result; transmission mode did not  
262 influence accuracy when hindcasting/forecasting (Figure S5) or when models were  
263 trained along a rolling window (Figure 4), though there was notable year-to-year  
264 variation in the latter.

## 265 Discussion

266 Community ecology and biogeography have a history as deeply linked fields, and  
267 both play an increasingly significant role in emerging infectious disease research.  
268 (Johnson *et al.*, 2015b; Murray *et al.*, 2015; Stephens *et al.*, 2016) However, research

269 connecting the two for global pathogen diversity is fairly limited so far. Our  
270 goal was to examine whether the intrinsic structure of pathogen biogeography,  
271 approached as a bipartite network, was predictable enough to enable forecasting of  
272 different outbreak types—even in the absence of any other mechanistic predictors,  
273 like transmission mode, phylogenetic data, or environmental covariates.

274 Despite obvious stochasticity and data limitations, the modeling approach per-  
275 formed well with as little as 7 to 10 years of training data, and when predicting  
276 country-pathogen network structure across large time windows. The model was  
277 able to capture pathogen outbreak and re-emergence potential well, suggesting  
278 that, at least at administrative levels, pathogen outbreak and re-emergence events  
279 are both recurrent and predictable (and that community assembly patterns are  
280 structured and predictive of outbreak potential). However, our model generally  
281 failed to forecast pathogen emergence events. This is maybe unsurprising, as pre-  
282 dicting when and where the next major public health threat will emerge is an  
283 incredibly difficult task which remains unsolved despite having received decades  
284 of attention (Allen *et al.*, 2017; Jones *et al.*, 2008; Morse *et al.*, 2012). However,  
285 the failure of community information to help anticipate local emergences is still  
286 disappointing, especially given the proposal that biogeographic “co-zones” could  
287 be useful strategic tools for pandemic forecasting. (Murray & Schaller, 2010)

288 We found some indications of differences in the predictability of pathogen  
289 events as a function of pathogen type and transmission modes. In the 2016  
290 model breakdown, bacteria were the most predictable while viruses were dispro-  
291 portionately unpredictable, as were zoonotic and vector-borne pathogens. Given  
292 how clearly unpredictable emergence events were, this might make intuitive sense:  
293 zoonotic pathogens make up the majority of emerging diseases (Jones *et al.*, 2008),  
294 and single-stranded RNA viruses (many vector-borne) have been responsible for  
295 many of the biggest recent emergence events (Johnson *et al.*, 2015a). However, this

296 pattern did not appear to hold up across all or even most years, and the factors  
297 that reduce model performance on a year-by-year basis are mostly unclear at the  
298 community level.

299 One contributor to interannual variation is large-scale events such as pan-  
300 demics, which appeared to strongly influence prediction of the entire country-  
301 pathogen network. While pandemic spread may be predictable using detailed infor-  
302 mation on climate, human movement, and local environmental suitability (Morse  
303 *et al.*, 2012; Tizzoni *et al.*, 2012; Zhang *et al.*, 2017), our approach lacks these mech-  
304 anistic predictors and is sensitive to these black swan events. This can be seen in  
305 reduced model performance during the 2009 flu pandemic, including for pathogens  
306 with no relationship to flu, although viruses and vector-borne pathogens are more  
307 severely affected (see Supplemental Materials). So while the model benefits from  
308 pathogen community data, rare and widespread events can strongly reduce model  
309 accuracy. Future work to differentially weight these stochastic events would prob-  
310 ably improve model performance.

311 While this approach enhances estimation of outbreak and emergence potential  
312 for rare pathogens or poorly sampled countries, it is also worth noting that our  
313 approach is *not* a valid standalone forecasting tool. This is in large part due to  
314 how time is used in the model: though year is a covariate, the model itself is not  
315 temporally explicit, meaning that the model can predict a certain link following on  
316 previous years, but it would be erroneous to interpret that as a forecast for a given  
317 point in time. However, the tool can be used to investigate pathogen outbreak and  
318 emergence potential under different pathogen range expansion scenarios. That  
319 is, researchers could construct artificial data which differs from empirical data  
320 slightly, and quantify the ability of the model to predict those novel events. Since  
321 the method is based on dissimilarity of countries and pathogen distributions at  
322 its core, it is possible to examine the expected outcome as pathogen distributions

323 become more (or less) homogeneous, or countries become more (or less) dissimilar  
324 in their pathogen communities.

325 Within infectious disease ecology, a disproportionate focus has emerged on the  
326 drivers and predictability of emergence events. (Allen *et al.*, 2017) Recent work  
327 offers a compelling case that community ecology might bring predictive tools to  
328 bear on that problem (Johnson *et al.*, 2015b), and modeling work suggests that  
329 community assembly data can be leveraged to better predict how pathogens spread  
330 (Murray *et al.*, 2015), the host range of emerging diseases (Dallas *et al.*, 2017b;  
331 Johnson *et al.*, 2015a), and the dynamics of diseases within an ecosystem (Parker  
332 *et al.*, 2015; Johnson *et al.*, 2013). Our results show how a simple model considering  
333 the entire pathogen community captures important global geographic variation  
334 in outbreak potential, but as a standalone tool, still struggles to predict when a  
335 pathogen will first arrive in a new region. Though this casts doubt on biogeographic  
336 tools like “co-zones” as standalone tools for surveillance or outbreak response,  
337 our study is a compelling indicator that community data could be very easily  
338 leveraged alongside other socioecological predictors to forecast disease emergence  
339 as an ecosystem process rather than a single-species one. With a Nipah virus  
340 outbreak in India and an Ebola virus outbreak in the Democratic Republic of the  
341 Congo alone both concurrent to the completion of this manuscript, the priority of  
342 prediction in emerging disease research only continues to grow.

### 343 **Acknowledgements**

344 We thank GIDEON (<https://www.gideononline.com/>) for their collection and  
345 curation of the data.

## 346 References

- 347 Allen, T., Murray, K.A., Zambrana-Torrel, C., Morse, S.S., Rondinini, C.,  
348 Di Marco, M., Breit, N., Olival, K.J. & Daszak, P. (2017). Global hotspots  
349 and correlates of emerging zoonotic diseases. *Nature Communications*, 8, 1124.
- 350 Balcan, D., Hu, H., Goncalves, B., Bajardi, P., Poletto, C., Ramasco, J.J., Paolotti,  
351 D., Perra, N., Tizzoni, M., Van den Broeck, W. *et al.* (2009). Seasonal transmis-  
352 sion potential and activity peaks of the new influenza a (h1n1): a monte carlo  
353 likelihood analysis based on human mobility. *BMC Medicine*, 7, 45.
- 354 Berger, S.A. (2005). GIDEON: a comprehensive web-based resource for geographic  
355 medicine. *International journal of health geographics*, 4, 10.
- 356 Bogoch, I.I., Brady, O.J., Kraemer, M.U., German, M., Creatore, M.I., Kulkarni,  
357 M.A., Brownstein, J.S., Mekaru, S.R., Hay, S.I., Groot, E. *et al.* (2016). An-  
358 ticipating the international spread of zika virus from brazil. *The Lancet*, 387,  
359 335–336.
- 360 Bonds, M.H., Keenan, D.C., Rohani, P. & Sachs, J.D. (2010). Poverty trap formed  
361 by the ecology of infectious diseases. *Proceedings of the Royal Society of London*  
362 *B: Biological Sciences*, 277, 1185–1192.
- 363 Carlson, C.J., Dougherty, E.R. & Getz, W. (2016). An ecological assessment of the  
364 pandemic threat of zika virus. *PLoS Neglected Tropical Diseases*, 10, e0004968.
- 365 Carlson, C.J., Getz, W.M., Kausrud, K.L., Cizauskas, C.A., Blackburn, J.K.,  
366 Bustos Carrillo, F.A., Colwell, R., Easterday, W.R., Ganz, H.H., Kamath, P.L.,  
367 Økstad, O.A., Turner, W.C., Kolstø, A. & Stenseth, N.C. (2018). Spores and  
368 soil from six sides: interdisciplinarity and the environmental biology of anthrax  
369 (*Bacillus anthracis*). *Biological Reviews*, 0, in press.

- 370 Carroll, D., Daszak, P., Wolfe, N.D., Gao, G.F., Morel, C.M., Morzaria, S., Pablos-  
371 Méndez, A., Tomori, O. & Mazet, J.A. (2018). The global virome project.  
372 *Science*, 359, 872–874.
- 373 Chiappini, E., Stival, A., Galli, L. & De Martino, M. (2013). Pertussis re-emergence  
374 in the post-vaccination era. *BMC Infectious Diseases*, 13, 151.
- 375 Cleaveland, S., Haydon, D. & Taylor, L. (2007). Overviews of pathogen emergence:  
376 which pathogens emerge, when and why? *Current Topics in Microbiology and*  
377 *Immunology*, pp. 85–111.
- 378 Dallas, T., Huang, S., Nunn, C., Park, A.W. & Drake, J.M. (2017a). Estimating  
379 parasite host range. *Proceedings of the Royal Society B: Biological Sciences*, 284,  
380 20171250.
- 381 Dallas, T., Park, A.W. & Drake, J.M. (2017b). Predictability of helminth parasite  
382 host range using information on geography, host traits and parasite community  
383 structure. *Parasitology*, 144, 200–205.
- 384 Drake, J. & Richards, R. (2017). Estimating environmental suitability. *bioRxiv*,  
385 p. 109041.
- 386 Farmer, P. (1996). Social inequalities and emerging infectious diseases. *Emerging*  
387 *Infectious Diseases*, 2, 259.
- 388 Han, B.A., Kramer, A.M. & Drake, J.M. (2016a). Global patterns of zoonotic  
389 disease in mammals. *Trends in Parasitology*, 32, 565–577.
- 390 Han, B.A., Schmidt, J.P., Alexander, L.W., Bowden, S.E., Hayman, D.T. & Drake,  
391 J.M. (2016b). Undiscovered bat hosts of filoviruses. *PLoS Neglected Tropical*  
392 *Diseases*, 10, e0004815.



- 393 Han, B.A., Schmidt, J.P., Bowden, S.E. & Drake, J.M. (2015). Rodent reservoirs  
394 of future zoonotic diseases. *Proceedings of the National Academy of Sciences*,  
395 112, 7039–7044.
- 396 Johnson, C.K., Hitchens, P.L., Evans, T.S., Goldstein, T., Thomas, K., Clements,  
397 A., Joly, D.O., Wolfe, N.D., Daszak, P., Karesh, W.B. *et al.* (2015a). Spillover  
398 and pandemic properties of zoonotic viruses with high host plasticity. *Scientific*  
399 *Reports*, 5.
- 400 Johnson, P.T., De Roode, J.C. & Fenton, A. (2015b). Why infectious disease  
401 research needs community ecology. *Science*, 349, 1259504.
- 402 Johnson, P.T., Preston, D.L., Hoverman, J.T. & LaFonte, B.E. (2013). Host and  
403 parasite diversity jointly control disease risk in complex communities. *Proceed-*  
404 *ings of the National Academy of Sciences*, 110, 16916–16921.
- 405 Jones, K.E., Patel, N.G., Levy, M.A., Storeygard, A., Balk, D., Gittleman, J.L. &  
406 Daszak, P. (2008). Global trends in emerging infectious diseases. *Nature*, 451,  
407 990–993.
- 408 Khan, K., Arino, J., Hu, W., Raposo, P., Sears, J., Calderon, F., Heidebrecht, C.,  
409 Macdonald, M., Liauw, J., Chan, A. *et al.* (2009). Spread of a novel influenza a  
410 (h1n1) virus via global airline transportation. *New England Journal of Medicine*,  
411 2009, 212–214.
- 412 McMichael, A.J. (2004). Environmental and social influences on emerging infec-  
413 tious diseases: past, present and future. *Philosophical Transactions of the Royal*  
414 *Society of London B: Biological Sciences*, 359, 1049–1058.
- 415 Minor, P.D. (2004). Polio eradication, cessation of vaccination and re-emergence  
416 of disease. *Nature Reviews Microbiology*, 2, 473.

- 417 Morse, S.S., Mazet, J.A., Woolhouse, M., Parrish, C.R., Carroll, D., Karesh, W.B.,  
418 Zambrana-Torrel, C., Lipkin, W.I. & Daszak, P. (2012). Prediction and pre-  
419 vention of the next pandemic zoonosis. *The Lancet*, 380, 1956–1965.
- 420 Murray, D.R. & Schaller, M. (2010). Historical prevalence of infectious diseases  
421 within 230 geopolitical regions: A tool for investigating origins of culture. *Jour-  
422 nal of Cross-Cultural Psychology*, 41, 99–108.
- 423 Murray, K.A., Preston, N., Allen, T., Zambrana-Torrel, C., Hosseini, P.R. &  
424 Daszak, P. (2015). Global biogeography of human infectious diseases. *Proceed-  
425 ings of the National Academy of Sciences*, 112, 12746–12751.
- 426 Olival, K.J., Hosseini, P.R., Zambrana-Torrel, C., Ross, N., Bogich, T.L. &  
427 Daszak, P. (2017). Host and viral traits predict zoonotic spillover from mammals.  
428 *Nature*, 546, 646–+.
- 429 Parker, I.M., Saunders, M., Bontrager, M., Weitz, A.P., Hendricks, R., Magarey,  
430 R., Suiter, K. & Gilbert, G.S. (2015). Phylogenetic structure and host abundance  
431 drive disease pressure in communities. *Nature*, 520, 542.
- 432 Parkes, M.W., Bienen, L., Breilh, J., Hsu, L.N., McDonald, M., Patz, J.A., Rosen-  
433 thal, J.P., Sahani, M., Sleigh, A., Waltner-Toews, D. *et al.* (2005). All hands on  
434 deck: transdisciplinary approaches to emerging infectious disease. *EcoHealth*, 2,  
435 258–272.
- 436 Pigott, D.M., Deshpande, A., Letourneau, I., Morozoff, C., Reiner, R.C., Kraemer,  
437 M.U., Brent, S.E., Bogoch, I.I., Khan, K., Biehl, M.H. *et al.* (2017). Local,  
438 national, and regional viral haemorrhagic fever pandemic potential in africa: a  
439 multistage analysis. *The Lancet*.
- 440 Poisot, T., Nunn, C. & Morand, S. (2014). Ongoing worldwide homogenization of  
441 human pathogens. *bioRxiv*, p. 009977.

- 442 Russell, C.A., Jones, T.C., Barr, I.G., Cox, N.J., Garten, R.J., Gregory, V., Gust,  
443 I.D., Hampson, A.W., Hay, A.J., Hurt, A.C. *et al.* (2008). The global circulation  
444 of seasonal influenza a (h3n2) viruses. *Science*, 320, 340–346.
- 445 Smith, K.F., Goldberg, M., Rosenthal, S., Carlson, L., Chen, J., Chen, C. &  
446 Ramachandran, S. (2014). Global rise in human infectious disease outbreaks.  
447 *Journal of the Royal Society Interface*, 11, 20140950.
- 448 Smith, K.F., Sax, D.F., Gaines, S.D., Guernier, V. & Guégan, J.F. (2007). Glob-  
449 alization of human infectious disease. *Ecology*, 88, 1903–1910.
- 450 Stephens, P.R., Altizer, S., Smith, K.F., Alonso Aguirre, A., Brown, J.H., Budis-  
451 chak, S.A., Byers, J.E., Dallas, T.A., Jonathan Davies, T., Drake, J.M. *et al.*  
452 (2016). The macroecology of infectious diseases: a new perspective on global-  
453 scale drivers of pathogen distributions and impacts. *Ecology Letters*, 19, 1159–  
454 1171.
- 455 Tatem, A.J., Rogers, D.J. & Hay, S. (2006). Global transport networks and infec-  
456 tious disease spread. *Advances in Parasitology*, 62, 293–343.
- 457 Tizzoni, M., Bajardi, P., Poletto, C., Ramasco, J.J., Balcan, D., Gonçalves, B.,  
458 Perra, N., Colizza, V. & Vespignani, A. (2012). Real-time numerical forecast of  
459 global epidemic spreading: case study of 2009 a/h1n1pdm. *BMC Medicine*, 10,  
460 165.
- 461 Tobler, W.R. (1970). A computer movie simulating urban growth in the detroit  
462 region. *Economic Geography*, 46, 234–240.
- 463 Yu, V.L. & Edberg, S.C. (2005). Global infectious diseases and epidemiology  
464 network (gideon): a world wide web-based program for diagnosis and informatics  
465 in infectious diseases. *Clinical Infectious Diseases*, 40, 123–126.

466 Zhang, Q., Sun, K., Chinazzi, M., y Piontti, A.P., Dean, N.E., Rojas, D.P., Merler,  
467 S., Mistry, D., Poletti, P., Rossi, L. *et al.* (2017). Spread of zika virus in the  
468 americas. *Proceedings of the National Academy of Sciences*, 114, E4334–E4343.

## 469 Figure captions

Figure 1: The dissimilarity-based model used takes mean dissimilarity values of pathogen distributions and between countries in a given year, and uses this information in addition to the product of these two values to train the PNP model. Pathogen occurrences among countries are present or absent (black dots in panel a indicate pathogen occurrences), and the density of dissimilarities where the pathogen occurred relative to the overall density of dissimilarities provides information on the suitability of pathogen occurrence in a given country (b), and forms the basis of the PNP model approach.

Figure 2: Pathogen events from previous years increased model predictive accuracy after an initial small decrease, suggesting that five years or more of data improves predictions, but accuracy could actually decrease in some data sparse situations where only two or three years of data were available.

Figure 3: Predictive accuracy decreased when attempting to forecast far into the past or future. Models were trained on either the period between 2005-2015 (for prediction into the past) or 1990-2000 (for prediction into the future).

Figure 4: Using a rolling window ( $t = 4$  years), we found that predictive accuracy did not increase as a result of enhanced surveillance and data collection of more recent years.

470 **Figures**

471 **Figure 1**

472

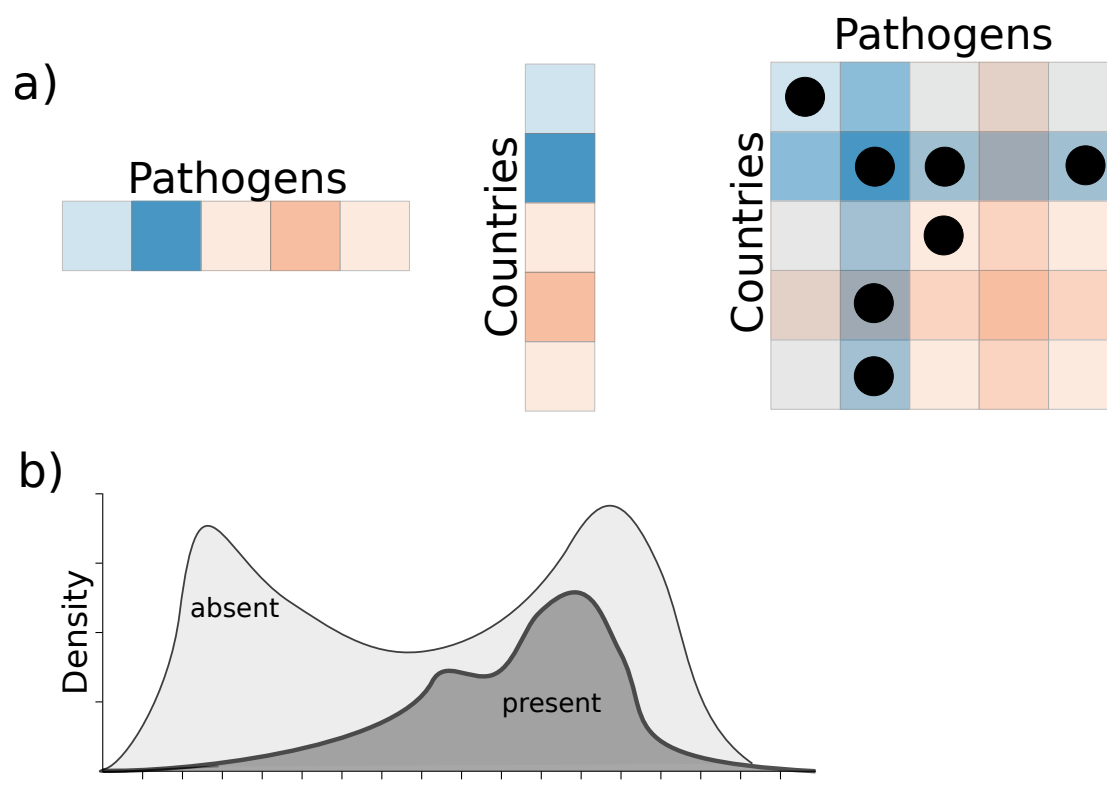

474

Figure 2

475

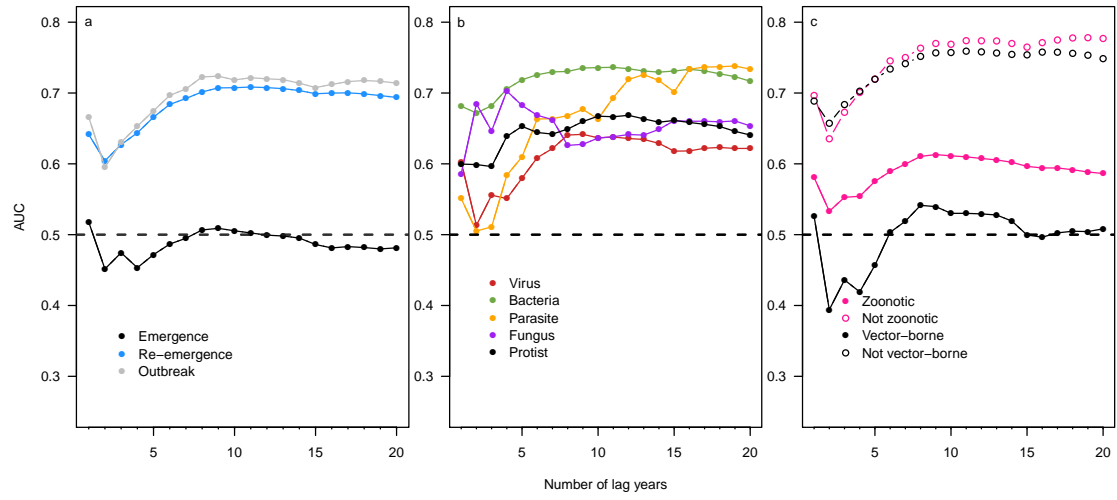

476

477

Figure 3

478

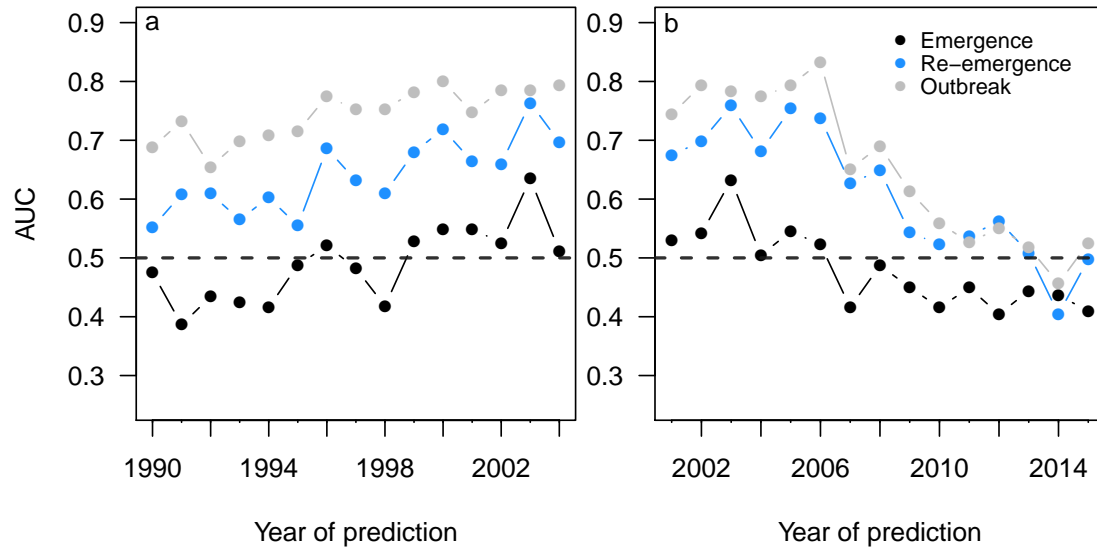

479



480

## Figure 4

481

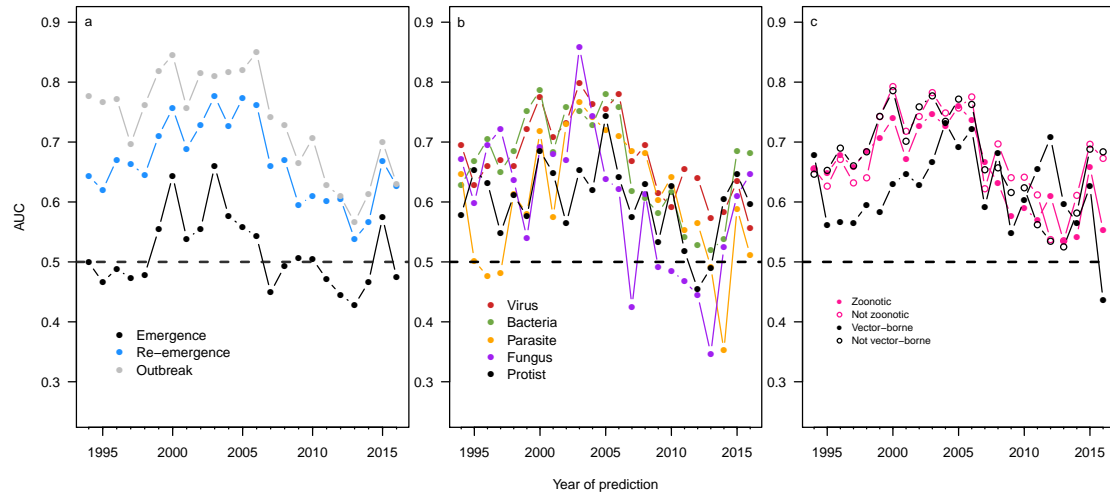

482

## 483 Supplemental materials

### 484 Effect of rolling window size

485 The size of the rolling window we used for model training prior to prediction  
486 could influence model performance. To examine this possibility, we used a rolling  
487 window of 7 years (compared to the 4 year window used in the main text), finding  
488 qualitatively similar results when flu was included (Figure S1) or excluded (Figure  
489 S2). We explored this further by examining rolling windows of 2, 4, and 6 years  
490 (Figure S3), with qualitatively similar findings. For this analysis, we excluded  
491 influenza, as we did in the main text.

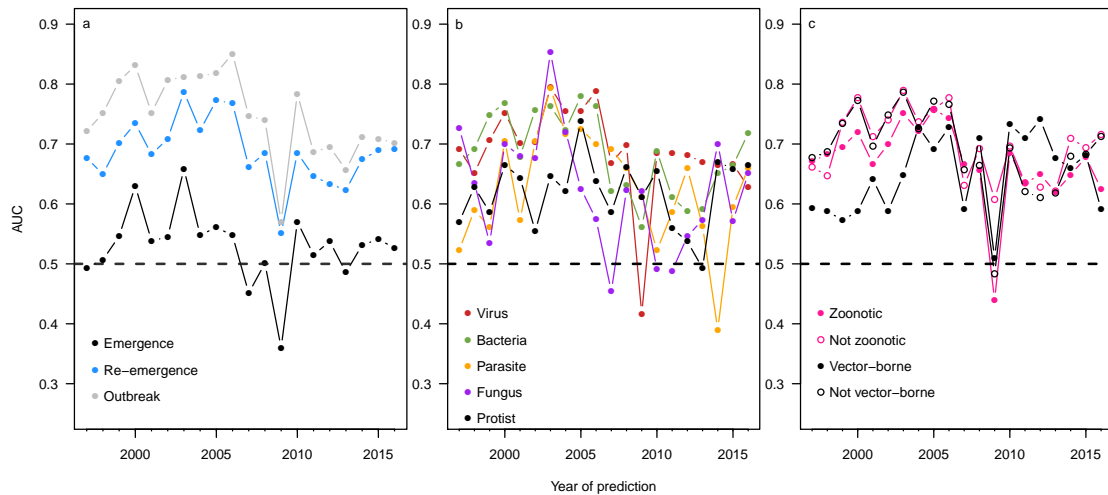

Figure S1: Rolling window size did not strongly influence model performance when considering next year prediction, as a window of 7 years produced qualitatively similar results to the window of 4 years we examine in the main text.

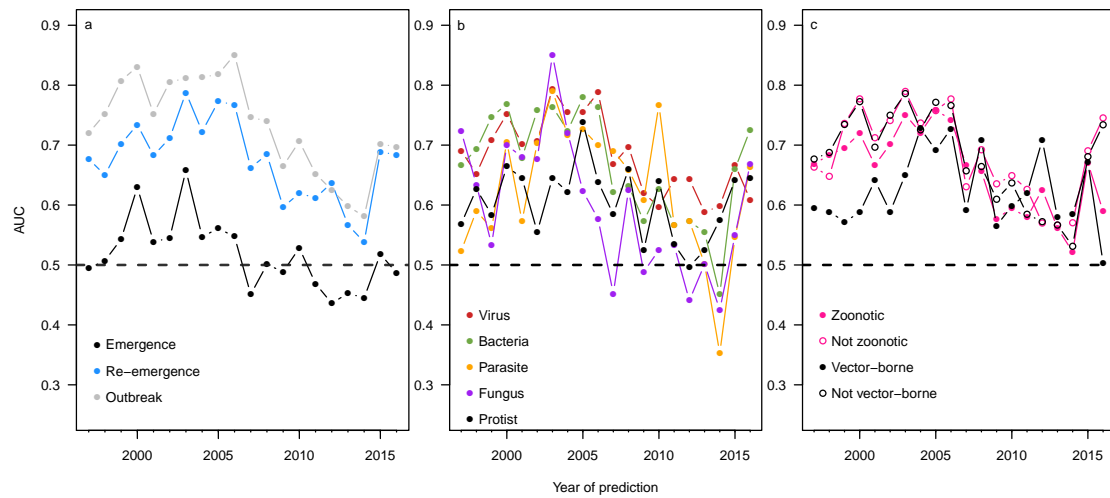

Figure S2: Rolling window size did not strongly influence model performance when considering next year prediction, as a window of 7 years produced qualitatively similar results to the window of 4 years we examine in the main text.

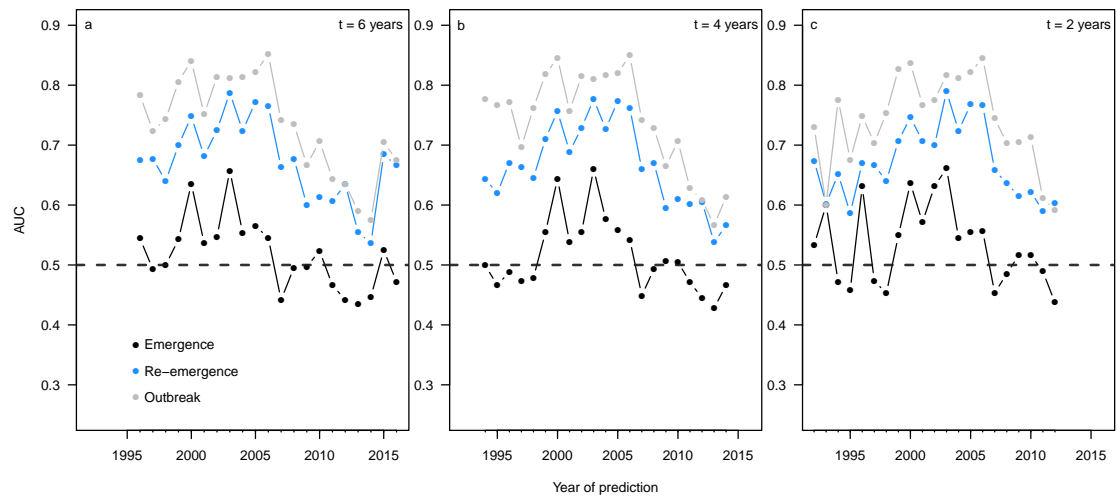

Figure S3: Examining rolling windows of 2, 4, and 6 years provides evidence that rolling window size did not strongly influence model performance.

492 **Effect of pathogen traits on model hindcasting/forecasting**  
493 **ability**

494 Here, we further explore the effect of pathogen type on model performance when  
495 hindcasting or forecasting pathogen outbreak or emergence event suitability. There  
496 was no predictable variation in model performance as a function of pathogen type  
497 (Figure S4) or whether the pathogen is classified as zoonotic or vector-borne (Fig-  
498 ure S5).

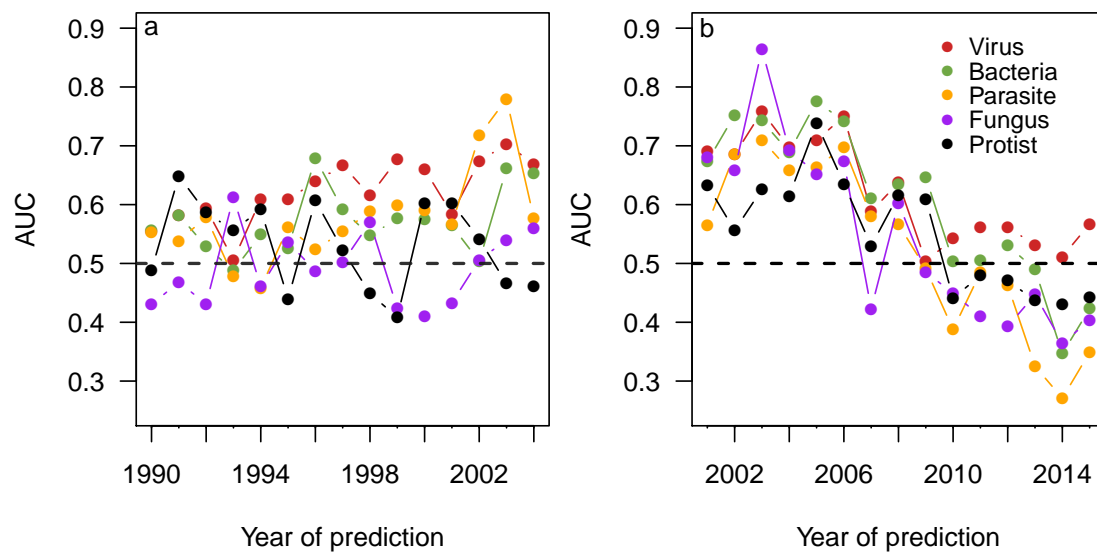

Figure S4: Predictive accuracy decreased when attempting to forecast far into the past or future, independent of pathogen type. Models were trained on either the period between 2005-2015 (for prediction into the past) or 1990-2000 (for prediction into the future).

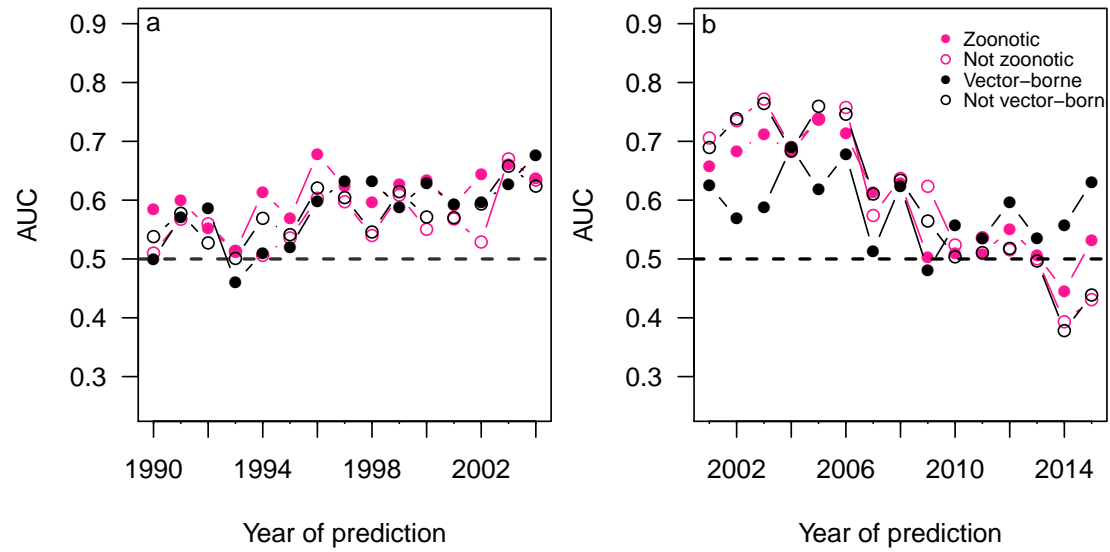

Figure S5: Predictive accuracy decreased when attempting to forecast far into the past or future. This was insensitive to whether the pathogen is considered zoonotic or vector-borne. Models were trained on either the period between 2005-2015 (for prediction into the past) or 1990-2000 (for prediction into the future).

## 499 **The effect of including influenza**

500 The 2009 influenza A pandemic fundamentally changed the network of countries  
501 and pathogens through the addition of many links to one pathogen (Figure S6).  
502 This may be an issue for approaches such as ours, which relies on extracting infor-  
503 mation from the similarity between pathogens in their distributions among coun-  
504 tries, and similarity between countries in their pathogen composition. When the  
505 model wasn't expected to predict a pandemic event, the inclusion of influenza did  
506 not substantially influence model predictions when trained on differing numbers  
507 of years (Figure S7) or when forecasting or hindcasting to different time periods  
508 (Figure S8). However, the effect of the 2009 influenza pandemic can be seen in the  
509 substantial declines in model performance when attempting to forecast one year  
510 ahead after training on a rolling window of 4 years (Figure S9). Interestingly, the  
511 exclusion of influenza results in lower mean performance when the model doesn't  
512 have data on many years, likely because influenza is widespread and can influence  
513 the pathogen and country dissimilarity values used to train the model. However,  
514 once sufficient data is provided, model performance with and without influenza is  
515 nearly identical.

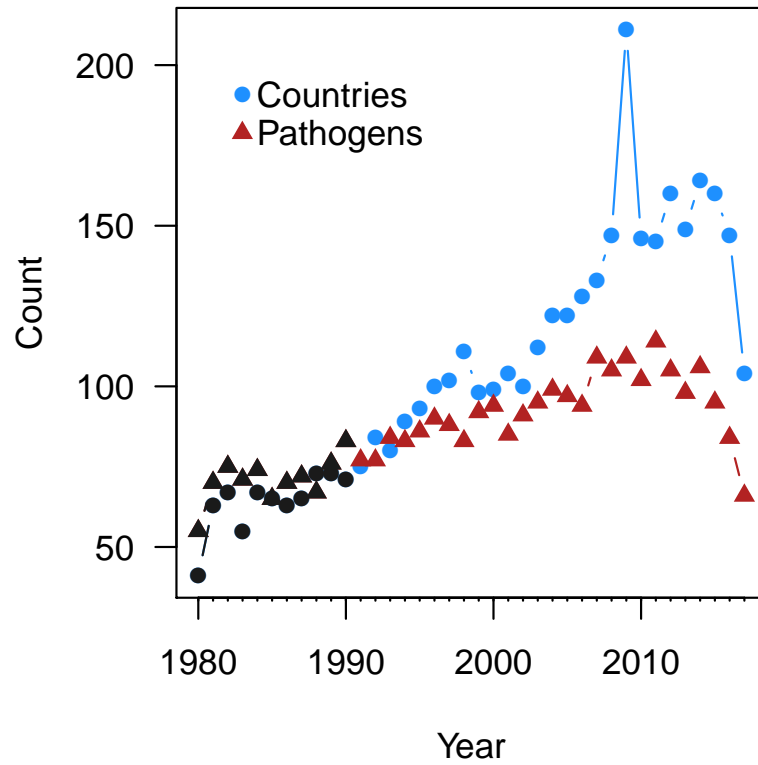

Figure S6: The number of countries with at least one outbreak event and the number of pathogens has increased over time, likely due to more vigilant sampling and description of emerging pathogens in a larger number of countries.



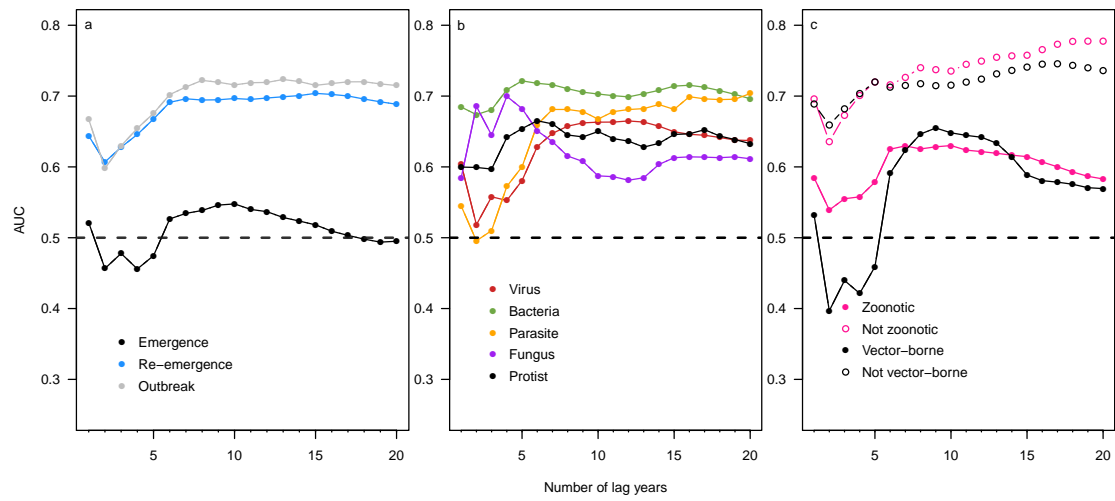

0

Figure S7: Pathogen events from previous years increased model predictive accuracy after an initial small decrease, suggesting that five years or more of data improves predictions, but accuracy could actually decrease in some data sparse situations where only two or three years of data were available.

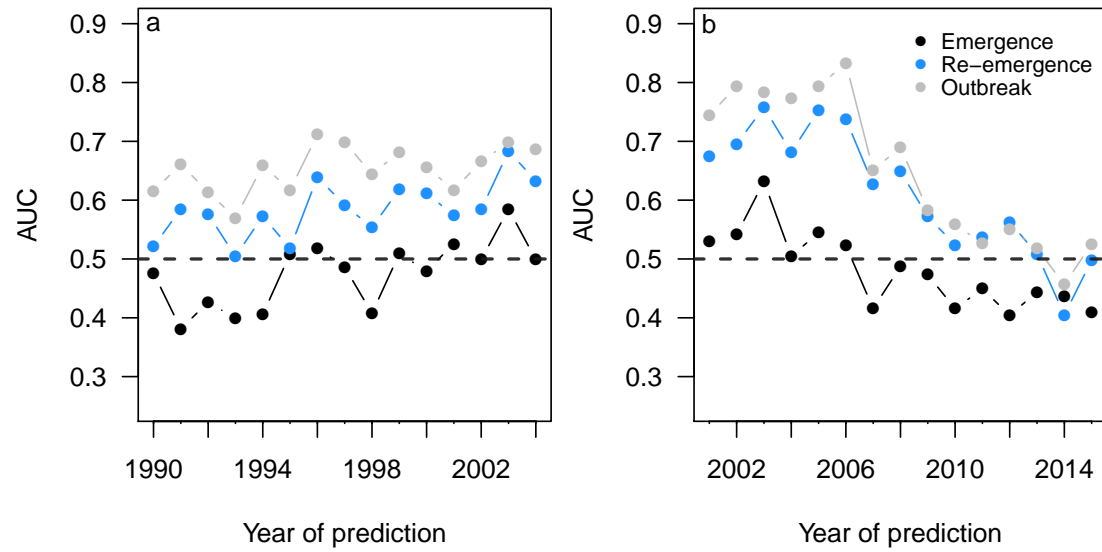

Figure S8: Predictive accuracy decreased when attempting to forecast far into the past or future. Models were trained on either the period between 2005-2015 (for prediction into the past) or 1990-2000 (for prediction into the future).

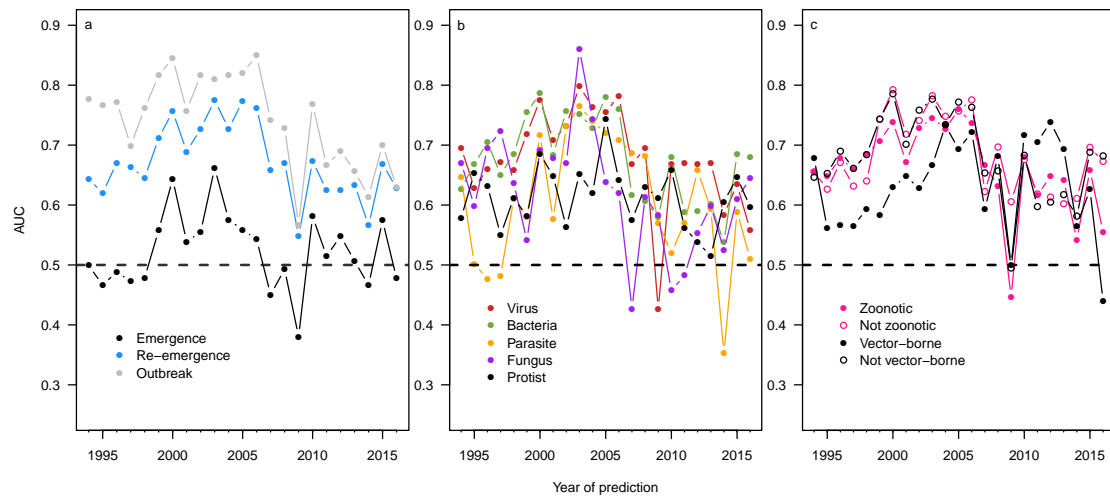

Figure S9: Using a rolling window ( $t = 4$  years), we found that predictive accuracy did not increase as a result of enhanced surveillance and data collection of more recent years.
